# Supplementary material
Source: PubMed Central journal article supplement (PMC4958604)
Supplement: NIHMS754416-supplement-supplement_1.pdf [file NIHMS754416-supplement-supplement_1.pdf]

Supplementary Table: Bladder cancer and cystectomy codes

| Code                  | Description                                             |
|-----------------------|---------------------------------------------------------|
| <i>Bladder cancer</i> |                                                         |
| B49..00               | Malignant neoplasm of urinary bladder                   |
| B490.00               | Malignant neoplasm of trigone of urinary bladder        |
| B491.00               | Malignant neoplasm of dome of urinary bladder           |
| B492.00               | Malignant neoplasm of lateral wall of urinary bladder   |
| B493.00               | Malignant neoplasm of anterior wall of urinary bladder  |
| B494.00               | Malignant neoplasm of posterior wall of urinary bladder |
| B495.00               | Malignant neoplasm of bladder neck                      |
| B496.00               | Malignant neoplasm of ureteric orifice                  |
| B49y.00               | Malignant neoplasm of other site of urinary bladder     |
| B49y000               | Malignant neoplasm, overlapping lesion of bladder       |
| B49z.00               | Malignant neoplasm of urinary bladder NOS               |
| B917.00               | Neoplasm of uncertain behaviour of bladder              |
| B917.12               | Transitional cell papilloma of bladder                  |
| BA04.00               | Neoplasm of unspecified nature of bladder               |
| <i>Cystectomy</i>     |                                                         |
| 7B20.00               | Total excision of bladder                               |
| 7B20.11               | Total cystectomy                                        |
| 7B20000               | Radical cystoprostatourethrectomy                       |
| 7B20100               | Radical cystourethrectomy - female                      |
| 7B20200               | Radical cystoprostatectomy                              |
| 7B20300               | Simple cystectomy                                       |
| 7B20400               | Cystectomy NEC                                          |
| 7B20500               | Cystourethrectomy                                       |
| 7B20y00               | Other specified total excision of bladder               |
| 7B20z00               | Total excision of bladder NOS                           |
